# Supplementary material for: Ultrastable tetraphenyl-p-phenylenediamine-based covalent organic frameworks as platforms for high-performance electrochemical supercapacitors
Source: Royal Society of Chemistry journal article supplement (doi:10.1039/c9cc08107k), 2019-01-01
Supplement: c9cc08107k1.pdf [file c9cc08107k1.pdf]

## Supporting Information

### Ultrastable tetraphenyl-*p*-phenylenediamine–based covalent organic frameworks as platforms for high-performance electrochemical supercapacitors

Ahmed F. M. EL-Mahdy,<sup>a,b</sup> Mohamed Gamal Mohamed,<sup>a,b</sup> Tharwat Hassan Mansoure,<sup>b,c,d</sup> Hsiao-Hua Yu<sup>c,d</sup>, Tao Chen,<sup>e</sup> and Shiao-Wei Kuo<sup>a,f\*</sup>

---

<sup>a</sup>Department of Materials and Optoelectronic Science, Center of Crystal Research, National Sun Yat-Sen University, Kaohsiung 80424, Taiwan.

<sup>b</sup>Chemistry Department, Faculty of Science, Assiut University, Assiut 71516, Egypt.

<sup>c</sup>Institute of Chemistry, Academia Sinica, 128 Academia Road Sec. 2, Nankang, Taipei 115, Taiwan.

<sup>d</sup>Department of Chemistry and Nanoscience and Technology Program, Taiwan International Graduate Program, Academia Sinica and National Taiwan University, Taipei 106, Taiwan.

<sup>e</sup>Ningbo Institute of Material Technology and Engineering, Chinese Academy of Science, Zhongguan West Road 1219, 315201 Ningbo, China

<sup>f</sup>Department of Medicinal and Applied Chemistry, Kaohsiung Medical University, Kaohsiung 807, Taiwan.

Email: kuosw@faculty.nsysu.edu.tw

| <b>Section</b> | <b>Content</b>                                                                    | <b>Page No.</b> |
|----------------|-----------------------------------------------------------------------------------|-----------------|
| <b>S1</b>      | <b>Materials</b>                                                                  | <b>S-3</b>      |
| <b>S2</b>      | <b>Characterization</b>                                                           | <b>S-3</b>      |
| <b>S3</b>      | <b>Synthetic Procedures</b>                                                       | <b>S-4</b>      |
| <b>S4</b>      | <b>Spectral Profiles of TPPDA(NH<sub>2</sub>)<sub>4</sub></b>                     | <b>S-8</b>      |
| <b>S5</b>      | <b>FTIR Spectral Profiles of Monomers and COFs</b>                                | <b>S-10</b>     |
| <b>S6</b>      | <b>Solid-state <sup>13</sup>C CP MAS NMR Spectra</b>                              | <b>S-12</b>     |
| <b>S7</b>      | <b>Thermal Gravimetric Analysis</b>                                               | <b>S-14</b>     |
| <b>S8</b>      | <b>Transmission Electron Microscopy (TEM)</b>                                     | <b>S-15</b>     |
| <b>S9</b>      | <b>Field Emission Scanning Electron Microscopy (FE-SEM)</b>                       | <b>S-17</b>     |
| <b>S10</b>     | <b>Experimental and Simulation X-ray Diffraction Patterns for COFs Structures</b> | <b>S-18</b>     |
| <b>S11</b>     | <b>PXRD data and BET parameters</b>                                               | <b>S-19</b>     |
| <b>S12</b>     | <b>Structural Modeling and Fractional atomic coordinates for COF Structures</b>   | <b>S-220</b>    |
| <b>S13</b>     | <b>Electrochemical Analysis</b>                                                   | <b>S-29</b>     |
| <b>S14</b>     | <b>References</b>                                                                 | <b>S-33</b>     |

## S1. Materials

Chemicals and solvents were obtained from commercial sources and used as received. Pyrene (98%), tetrakis(triphenylphosphine)palladium(0) (99%), and palladium on activated carbon (10% Pd/C) were obtained from Acros. 1,1,2,2-Tetraphenylethylene (98%), bromine (99.99%), *n*-butanol (99.5%), *o*-dichlorobenzene (99%), acetic acid (99.8%), and 4-formylphenylboronic acid (95.0%) were purchased from Sigma–Aldrich. Hydrazine monohydrate ( $\geq 98\%$ ), and 1-fluoro-4-nitrobenzene (99%) were obtained from Alfa Aesar. 1,4-Dioxane was purchased from J. T. Baker.

## S2. Characterization

$^1\text{H}$  and  $^{13}\text{C}$  NMR spectra were recorded using an INOVA 500 instrument with DMSO- $d_6$  and  $\text{CDCl}_3$  as solvents and tetramethylsilane (TMS) as the external standard. Chemical shifts are provided in parts per million (ppm). FTIR spectra were recorded using a Bruker Tensor 27 FTIR spectrophotometer and the conventional KBr plate method; 32 scans were collected at a resolution of  $4\text{ cm}^{-1}$ . Solid state nuclear magnetic resonance (SSNMR) spectra were recorded using a Bruker Avance 400 NMR spectrometer and a Bruker magic-angle-spinning (MAS) probe, running 32,000 scans. Cross-polarization with MAS (CPMAS) was used to acquire  $^{13}\text{C}$  NMR spectral data at 75.5 MHz. The CP contact time was 2 ms;  $^1\text{H}$  decoupling was applied during data acquisition. The decoupling frequency corresponded to 32 kHz. The MAS sample spinning rate was 10 kHz. TGA was performed using a TA Q-50 analyzer under a flow of  $\text{N}_2$ . The samples were sealed in a Pt cell and heated from 40 to 800  $^\circ\text{C}$  at a heating rate of 20  $^\circ\text{C min}^{-1}$  under  $\text{N}_2$  at a flow rate of 50  $\text{mL min}^{-1}$ . PXRD was performed using a Siemens D5000 using monochromated  $\text{Cu/K}\alpha$  ( $\lambda = 0.1542\text{ nm}$ ). The sample was spread in a thin layer on the square recess of an XRD sample holder. The BET surface areas and porosimetry measurements of the prepared samples (ca. 20–100 mg) were performed using a Micromeritics ASAP 2020 Surface Area and Porosity analyzer. Nitrogen isotherms were generated through incremental exposure to ultrahigh-purity  $\text{N}_2$  (up to ca. 1 atm) in a liquid  $\text{N}_2$  (77 K) bath. FE-SEM was conducted using a JEOL JSM-7610F scanning electron microscope. Samples were subjected to Pt sputtering for 100 s prior to observation. TEM was

performed using a JEOL-2100 scanning electron microscope, operated at 200 kV. Molecular modeling was performed using Reflex, a software package for crystal determination from XRD patterns. Unit cell dimensions were first determined manually from the observed XRD peak positions using the coordinates.

### S3. Synthetic Procedures

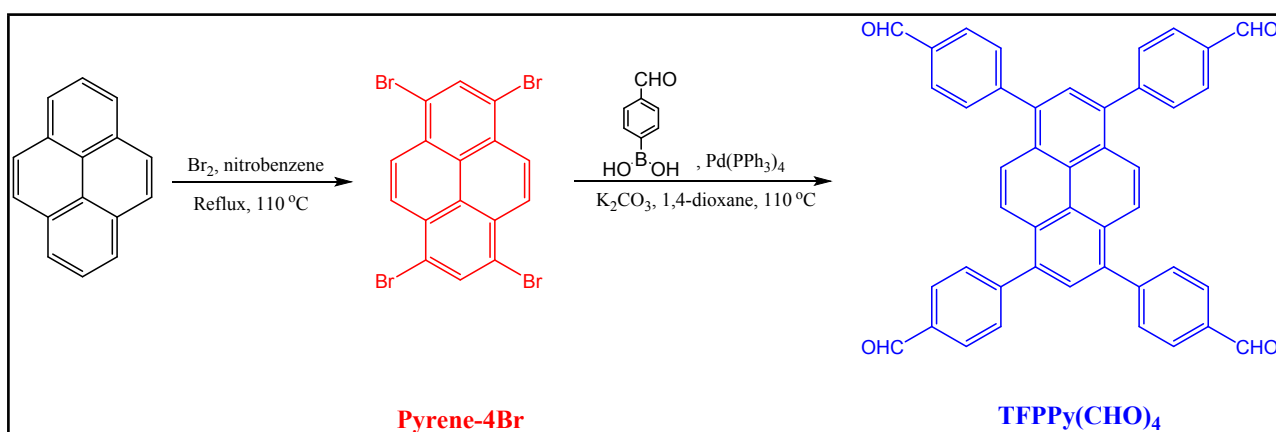

**Scheme S1.** Synthesis of 1,3,6,8-tetrakis(4-formylphenyl)pyrene [TFPPy(CHO)<sub>4</sub>].

TFPPy(CHO)<sub>4</sub> was synthesized through Suzuki coupling, as described in literature.<sup>S1</sup> 1,3,6,8-Tetrabromopyrene (Pyrene-4Br) was prepared as described in the literature.<sup>S2</sup>

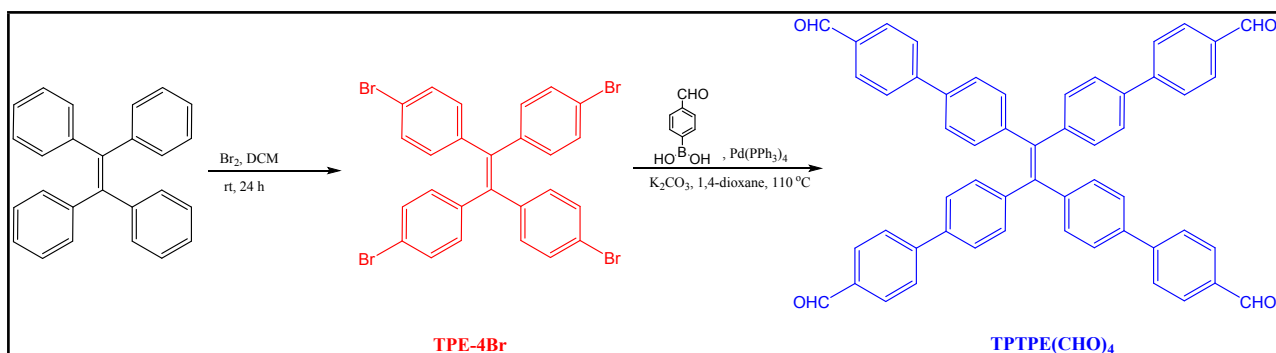

**Scheme S2.** Synthesis of 1,1,2,2-tetrakis[4-formyl-(1,1'-biphenyl)]ethane [TPTPE(CHO)<sub>4</sub>].

#### Tetrakis(4-bromophenyl)ethylene (TPE-4Br)

TPE-4Br was synthesized according to a literature method,<sup>S3</sup> with slightly modification. Bromine (4.00 mL, 80.0 mmol) was added to a solution of tetraphenylethylene (3.32 g, 10.0 mmol) in glacial acetic acid (10 mL) and CH<sub>2</sub>Cl<sub>2</sub> (20 mL) at 0 °C. The resulting mixture was stirred at room temperature for 3 h, and then poured into ice water (100 mL) and extracted with CH<sub>2</sub>Cl<sub>2</sub>. The organic phase was dried (MgSO<sub>4</sub>) and the solvent evaporated under reduced pressure. The crude product was purified through recrystallization (MeOH) to give a white solid (18.0 g, 90 %); <sup>1</sup>H NMR (CDCl<sub>3</sub>, 25 °C, 500 MHz): 6.85 (d, *J* = 8.56 Hz, 8H), 7.26 (d, *J* = 8.56 Hz, 8H). <sup>13</sup>C NMR (CDCl<sub>3</sub>, 25 °C, 125 MHz): 121.50, 131.52, 132.98, 139.82, 141.69.

### 1,1,2,2-Tetrakis[4-formyl-(1,1'-biphenyl)]ethane [TPTPE(CHO)<sub>4</sub>]

TPTPE(CHO)<sub>4</sub> was synthesized according to a published procedure.<sup>S4</sup> An aqueous solution of K<sub>2</sub>CO<sub>3</sub> (1.66 g, 12 mmol) in water (15 mL) and tetrabutylammonium chloride (1 mL) were added to a solution of tetrakis(4-bromophenyl)ethylene (684 mg, 1.00 mmol) and 4-formylphenylboronic acid (900 mg, 6.00 mmol) in toluene (80 mL). Pd(PPh<sub>3</sub>)<sub>4</sub> (10 mg) was added and then the mixture was stirred at 85 °C for 24 h. After cooling to room temperature, water was added and the organic layer was separated. Addition of MeOH to the organic layer precipitated a crude product. Recrystallization (CHCl<sub>3</sub>/diethyl ether) gave a yellowish green solid (535 mg, 71%); <sup>1</sup>H NMR (DMSO-*d*<sub>6</sub>, 25 °, 500 MHz): δ (ppm) = 10.03 (s, 4H), 7.96 (d, *J* = 8.3 Hz, 8H), 7.90 (d, *J* = 8.3 Hz, 8H), 7.69 (d, *J* = 8.3 Hz, 8H), 7.24 (d, *J* = 8.3 Hz, 8H).

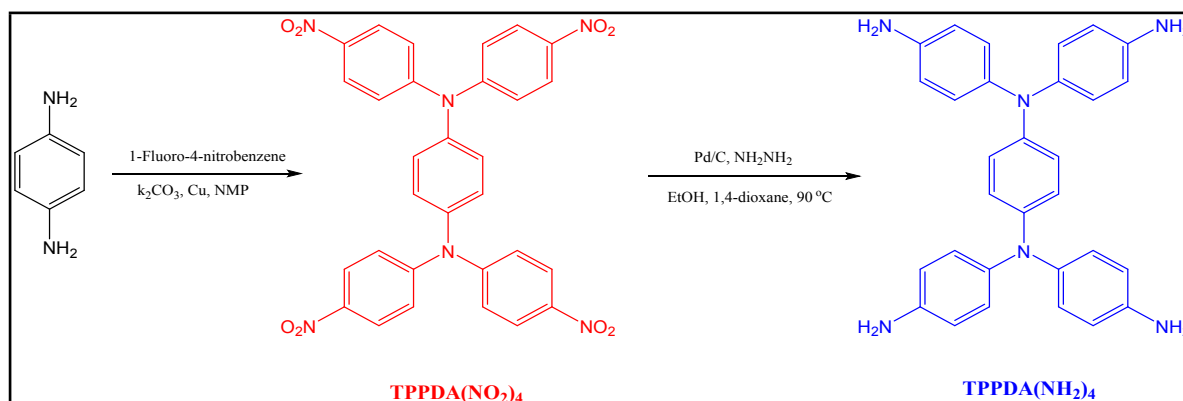

**Scheme S3.** Synthesis of  $N^1,N^1,N^4,N^4$ -tetrakis(4-aminophenyl)-*p*-phenylenediamine [TPPDA(NH<sub>2</sub>)<sub>4</sub>].

**$N^1,N^1,N^4,N^4$ -Tetrakis(4-nitrophenyl)-*p*-phenylenediamine [TPPDA(NO<sub>2</sub>)<sub>4</sub>]**

*p*-Phenylenediamine (5.00 g, 46.0 mmol), 1-fluoro-4-nitrobenzene (39.1 g, 277 mmol), and K<sub>2</sub>CO<sub>3</sub> (115 g, 832 mmol) were dissolved in 1-methyl-2-pyrrolidone (60 mL). The mixture was stirred while heating under reflux for 72 h and then cooled to ambient temperature to obtain crystals, which were washed sequentially with 1-methyl-2-pyrrolidone and water and then dried in air to obtain a solid (26.3 g, 96%). M.p.: 300 °C. Mass spectrum: *m/z* 592.

**$N^1,N^1,N^4,N^4$ -Tetrakis(4-aminophenyl)-*p*-phenylenediamine [TPPDA(NH<sub>2</sub>)<sub>4</sub>]**

In a 100-mL two-neck round-bottom flask equipped with a stirring bar, TPPDA(NO<sub>2</sub>)<sub>4</sub> (2.00 g, 3.37 mmol) and 10% Pd/C (0.20 g) were suspended in EtOH (20 mL) and 1,4-dioxane (40 mL) under a N<sub>2</sub> atmosphere. The suspension was heated at 90 °C for 15 min before hydrazine monohydrate (5.5 mL) was added slowly. The mixture was stirred at 90 °C for 36 h and then it was filtered to remove the Pd/C. The filtrate was cooled, giving greenish crystals, which were filtered off and dried under vacuum at 70 °C to obtain TPPDA(NH<sub>2</sub>)<sub>4</sub> (0.8 g, 50%). FTIR (powder): 3456–3334, 3063–2836, 1626, 1500, 1256, 824 cm<sup>-1</sup>. <sup>1</sup>H NMR (DMSO-*d*<sub>6</sub>, 25 °C, 500 MHz): 4.81 (br s, 4NH<sub>2</sub>, 8H), 6.46 (d, *J* = 8.50 Hz, 12H), 6.68 (d, *J* = 8.50 Hz, 8H). <sup>13</sup>C NMR (DMSO-*d*<sub>6</sub>, 25 °C, 125 MHz): 145.17, 142.57, 138.05, 126.49, 120.96, 115.44.

**TPPDA-TPPy COF**

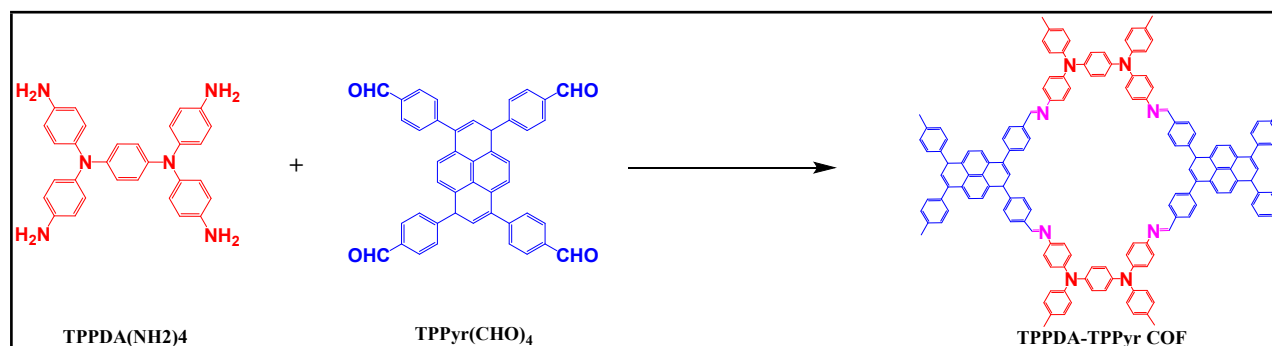

**Scheme S4.** Synthesis of the TPPDA-TPPy COF.

In a 25-mL Schlenk storage tube, TPPDA(NH<sub>2</sub>)<sub>4</sub> (100 mg, 0.210 mmol) and TPPyr(CHO)<sub>4</sub> (131 mg, 0.210 mmol) was dissolved in *n*-butanol (5 mL) and *o*-dichlorobenzene (5 mL) in the presence of acetic acid (6 M, 1 mL). The tube was sealed and degassed through three freeze/pump/thaw cycles. The tube was sealed off by flame and heated at 120 °C for 3 days. After cooling to room temperature, the tube was opened and the precipitate filtered and washed two times with *n*-butanol, THF, and acetone respectively. The solid was dried under vacuum at 120 °C overnight to afford TPPDA-TPPyr COF as an orange powder.

#### TPPDA-TPTPE COF

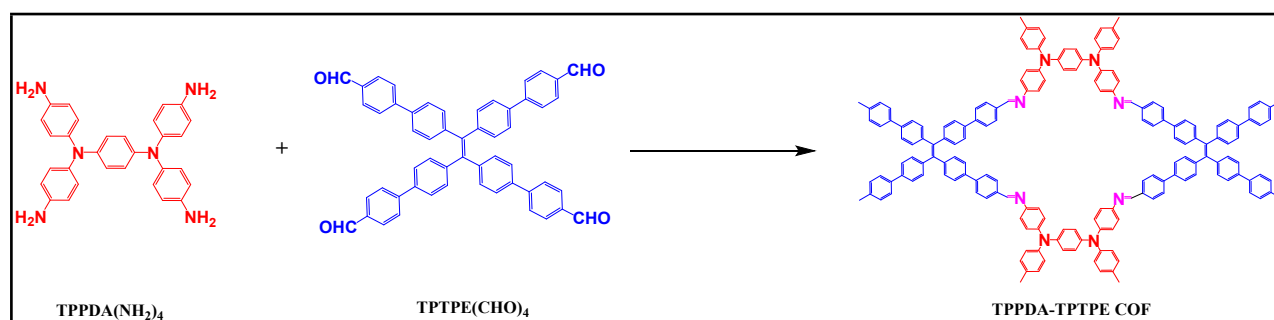

**Scheme S5.** Synthesis of the TPPDA-TPTPE COF.

In a 25-mL Schlenk storage tube, TPPDA(NH<sub>2</sub>)<sub>4</sub> (100 mg, 0.210 mmol) and TPTPE(CHO)<sub>4</sub> (156 mg, 0.210 mmol) was dissolved in *n*-butanol (5 mL) and *o*-dichlorobenzene (5 mL) in the presence of acetic acid (6 M, 1 mL). The tube was sealed and degassed through three freeze/pump/thaw cycles. The tube was sealed off by flame and heated at 120 °C for 3 days. After cooling to room temperature, the tube was opened and the precipitate was filtered and washed two times with *n*-butanol, THF and acetone, respectively. The solid was dried under vacuum at 120 °C overnight to afford TPPDA-TPTPE COF as an orange powder.

#### S4. Spectral Profiles of TPPDA(NH<sub>2</sub>)<sub>4</sub>

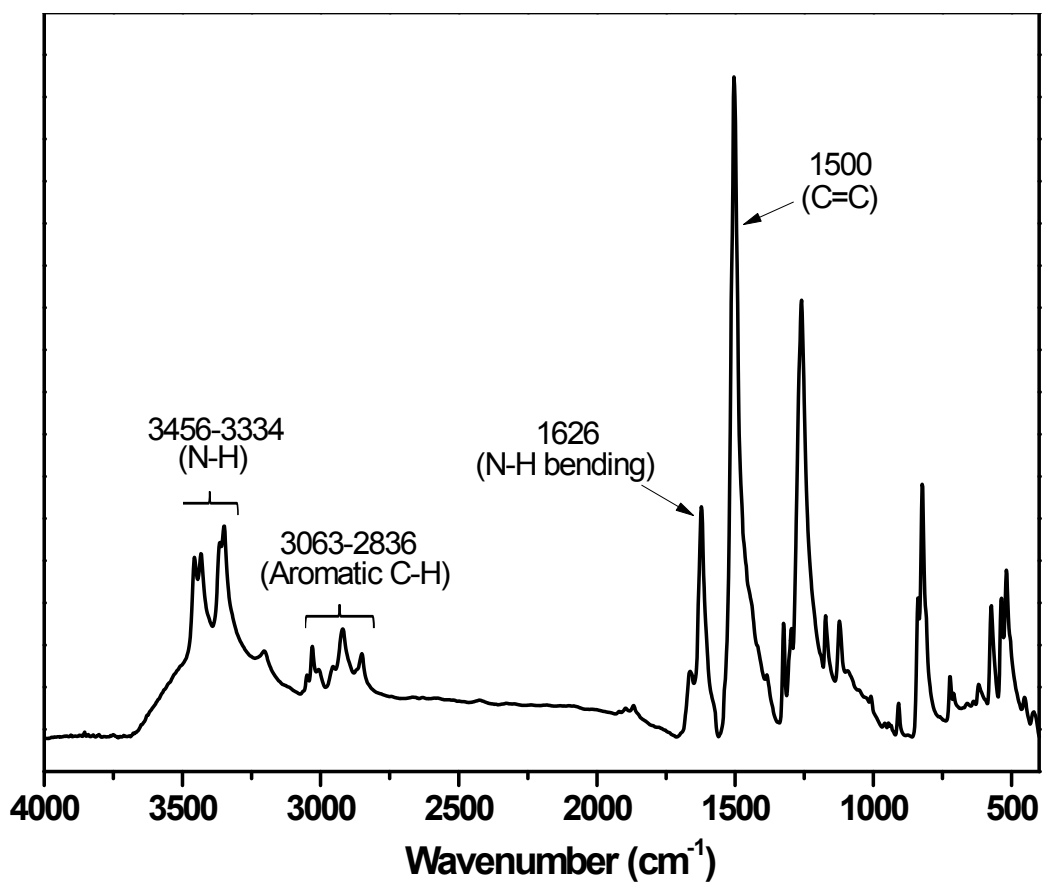

Fig. S1. FTIR spectrum of TPPDA(NH<sub>2</sub>)<sub>4</sub>.

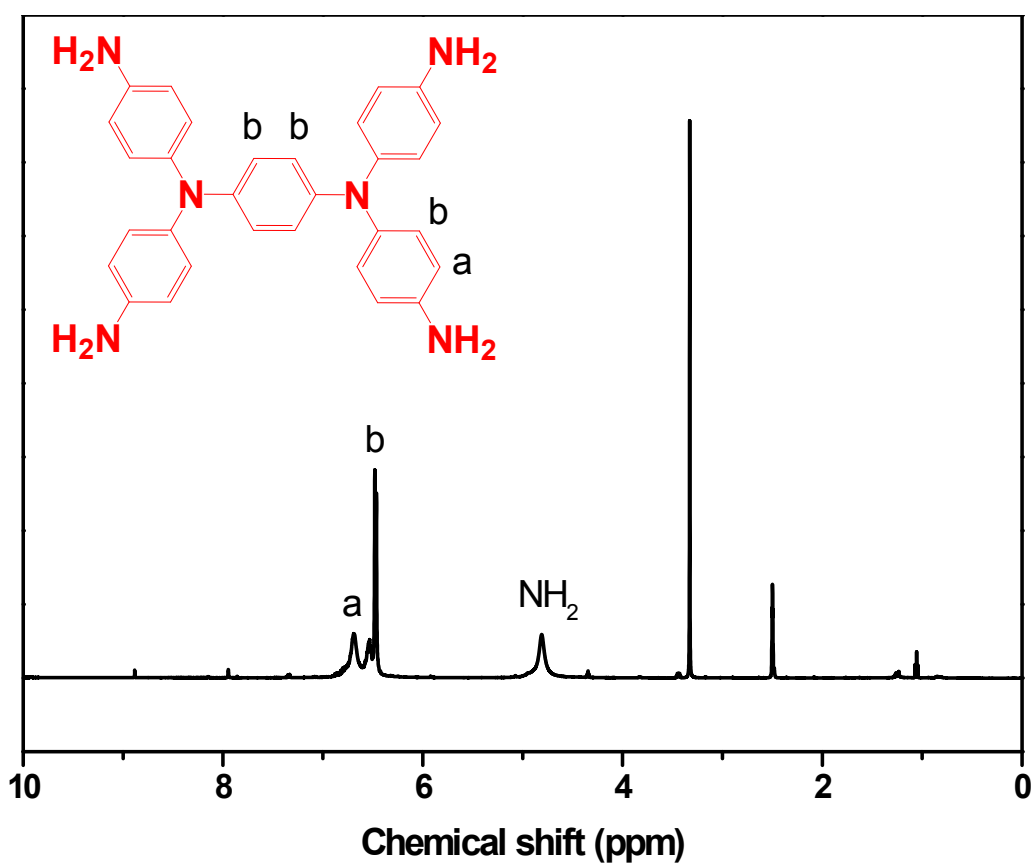



Fig. S2.  $^1\text{H}$  NMR spectrum of  $\text{TPPDA}(\text{NH}_2)_4$ .

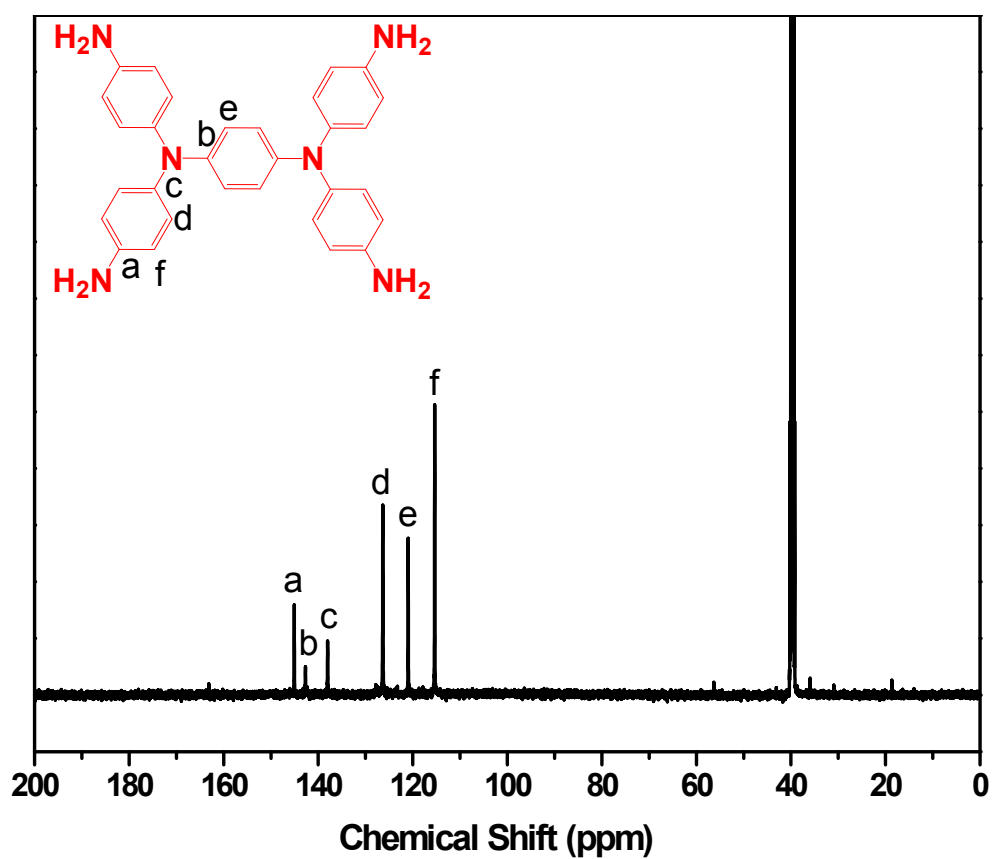

Fig. S3.  $^{13}\text{C}$  NMR spectrum of  $\text{TPPDA}(\text{NH}_2)_4$ .

## S5. FTIR Spectral Profiles of Monomers and COFs

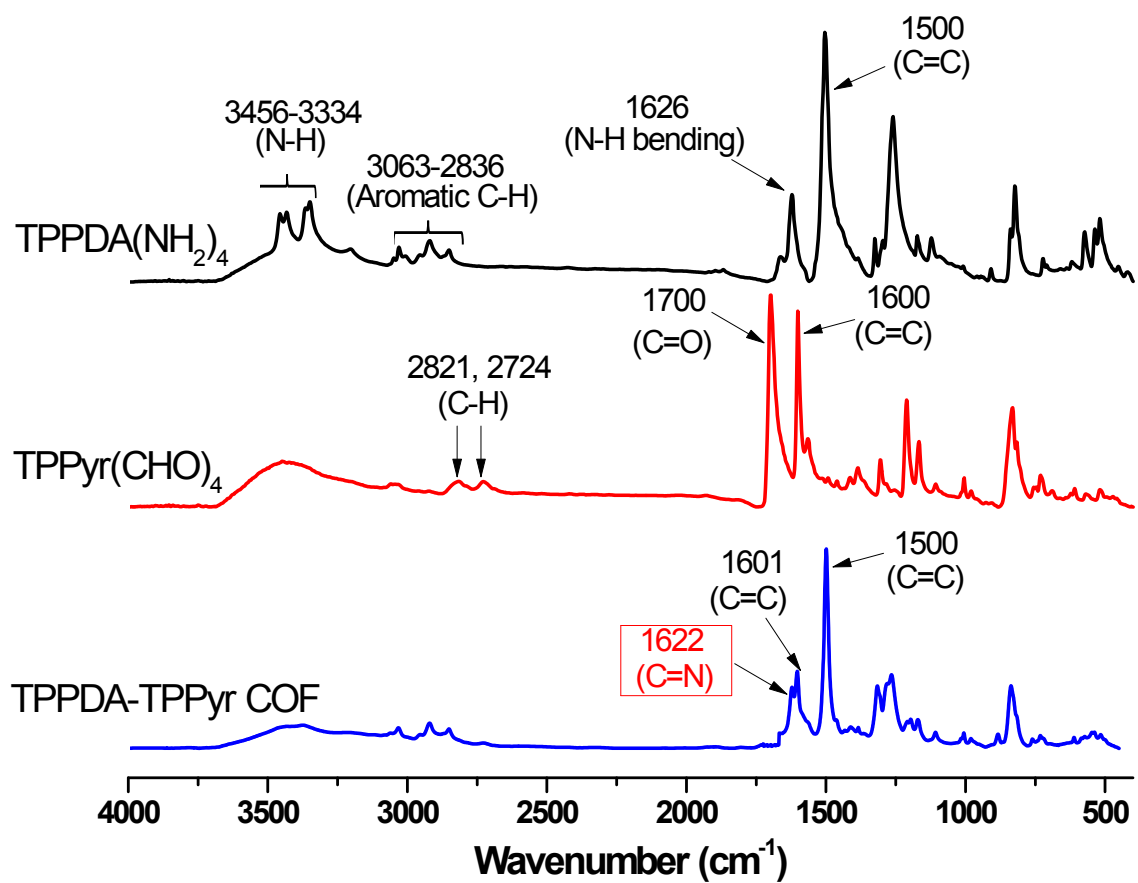

**Fig. S4.** FTIR spectra of TPPDA( $\text{NH}_2$ )<sub>4</sub>, TPPyr(CHO)<sub>4</sub>, and the TPPDA-TPPyr COF.

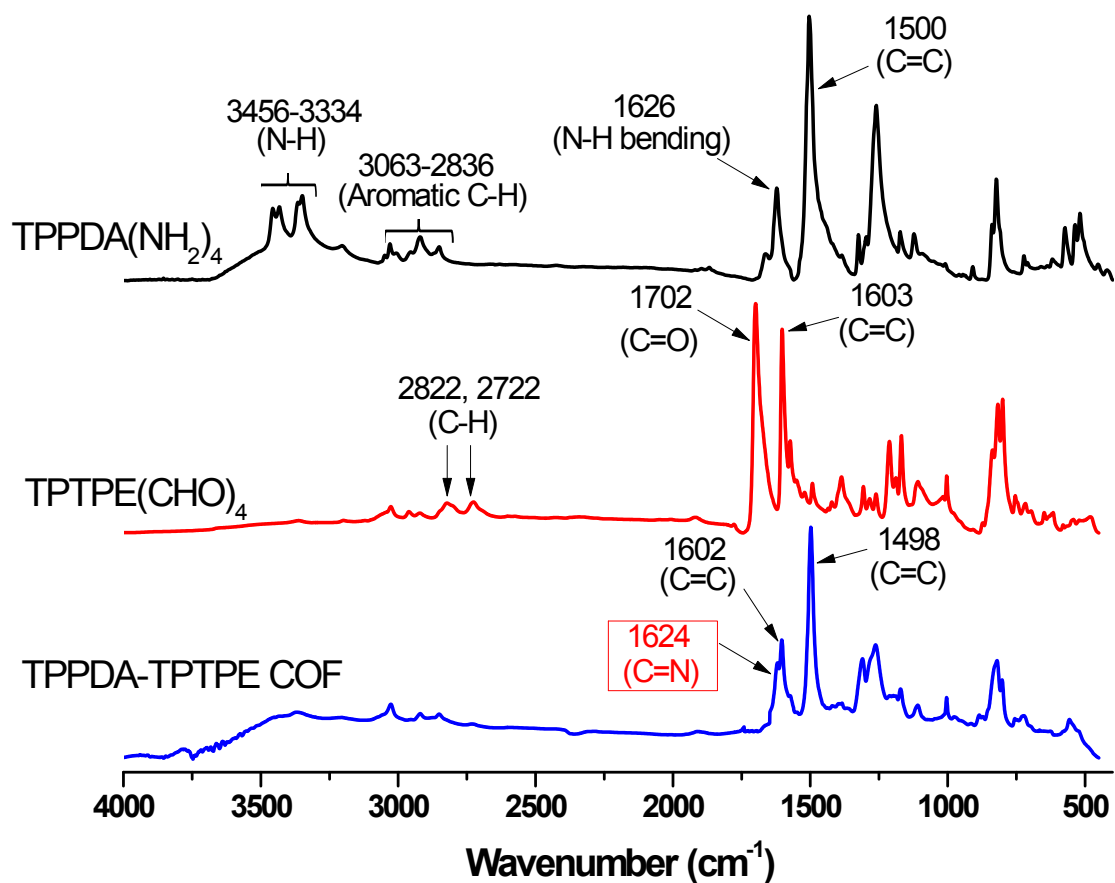

**Fig. S5.** FTIR spectra of TPPDA( $\text{NH}_2$ )<sub>4</sub>, TPTPE(CHO)<sub>4</sub>, and the TPPDA-TPTPE COF.

## S6. Solid-state $^{13}\text{C}$ CP MAS NMR Spectra

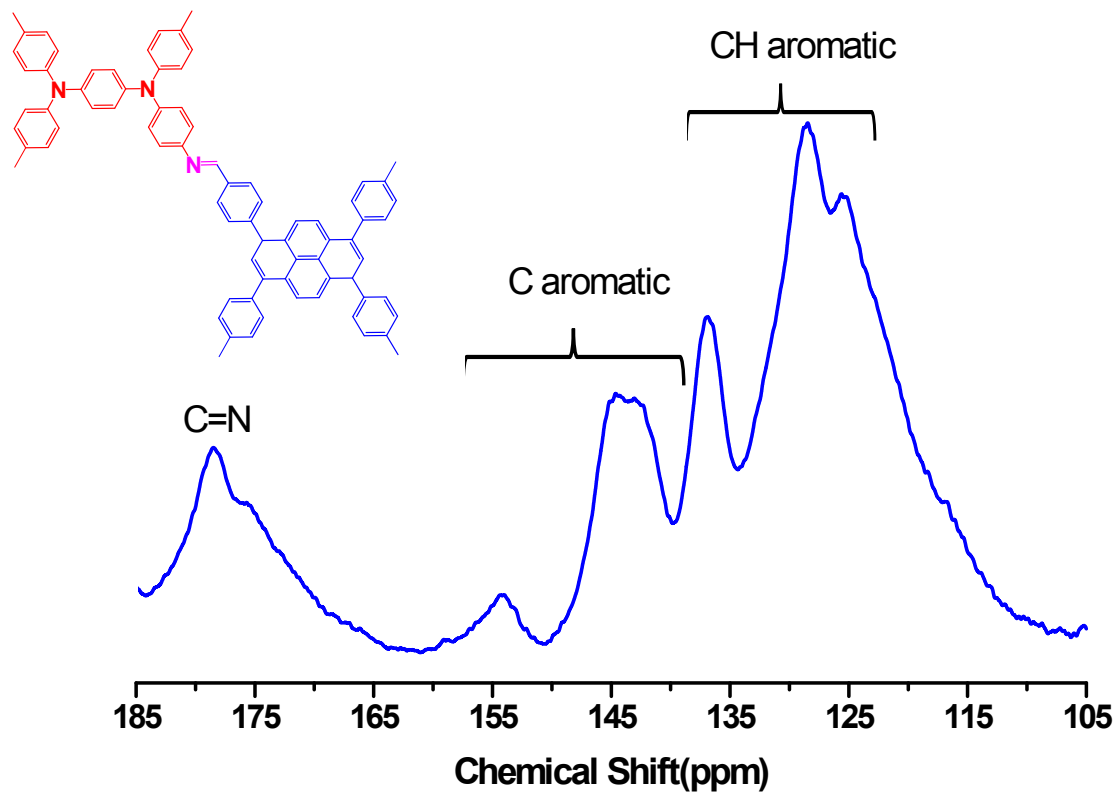

**Fig. S6.**  $^{13}\text{C}$  Cross-polarization magic-angle-spinning solid state NMR spectrum of the TPPDA-TPPy COF.

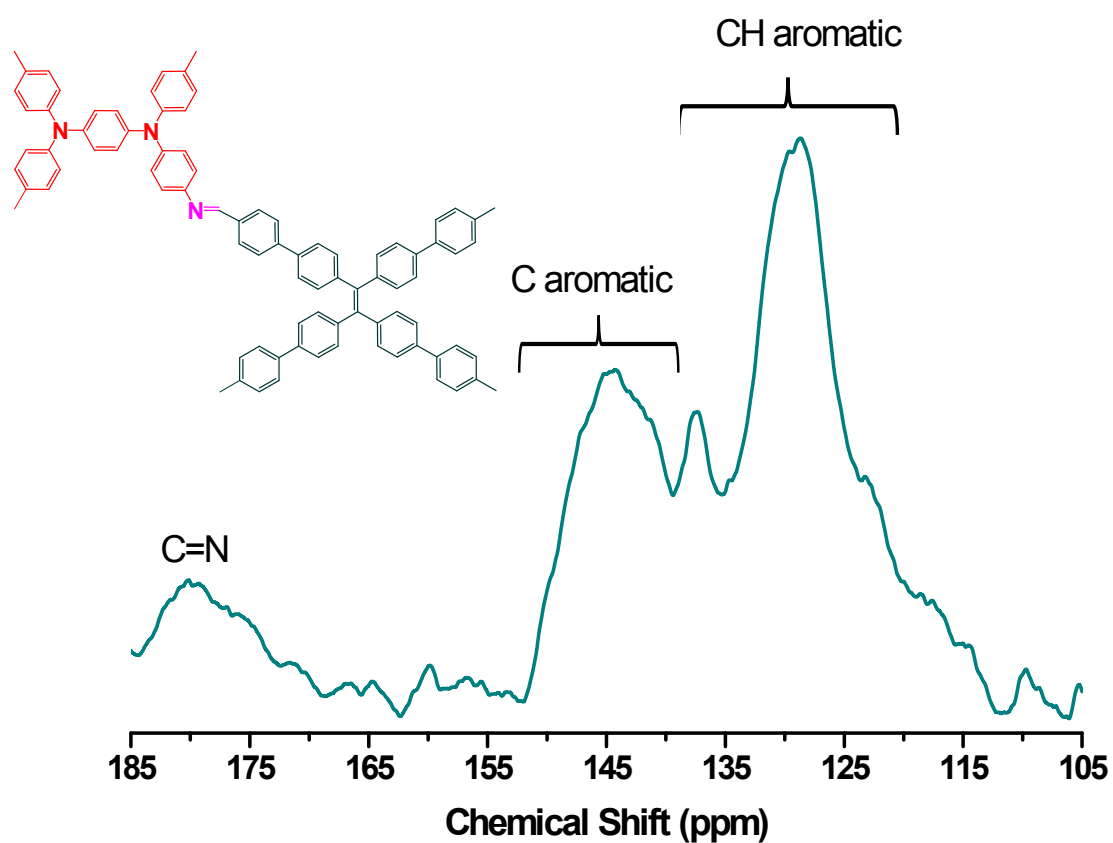

**Fig. S7.**  $^{13}\text{C}$  Cross-polarization magic-angle-spinning solid state NMR spectrum of the TPPDA-TPTPE COF.

## S7. Thermal Gravimetric Analysis

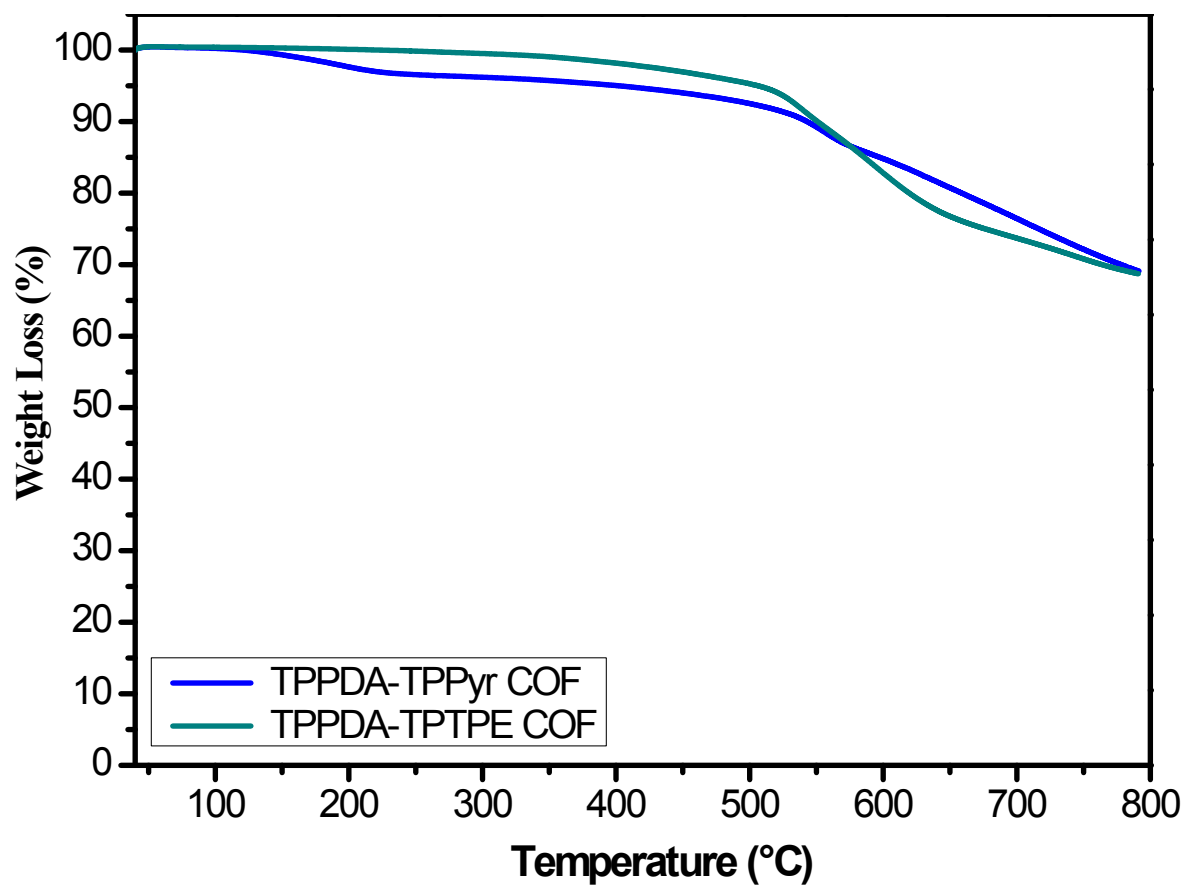

Fig. S8. TGA analyses of the TPPDA-TPPy and TPPDA-TPTPE COFs.

Table S1. Values of  $T_{d10\%}$  and Char yield of COFs.

|                 | $T_{d10\%}$ (°C) | Char yield (%) |
|-----------------|------------------|----------------|
| TPPDA-TPPy COF  | 543              | 70             |
| TPPDA-TPTPE COF | 551              | 68             |

## S8. Transmission Electron Microscopy (TEM)

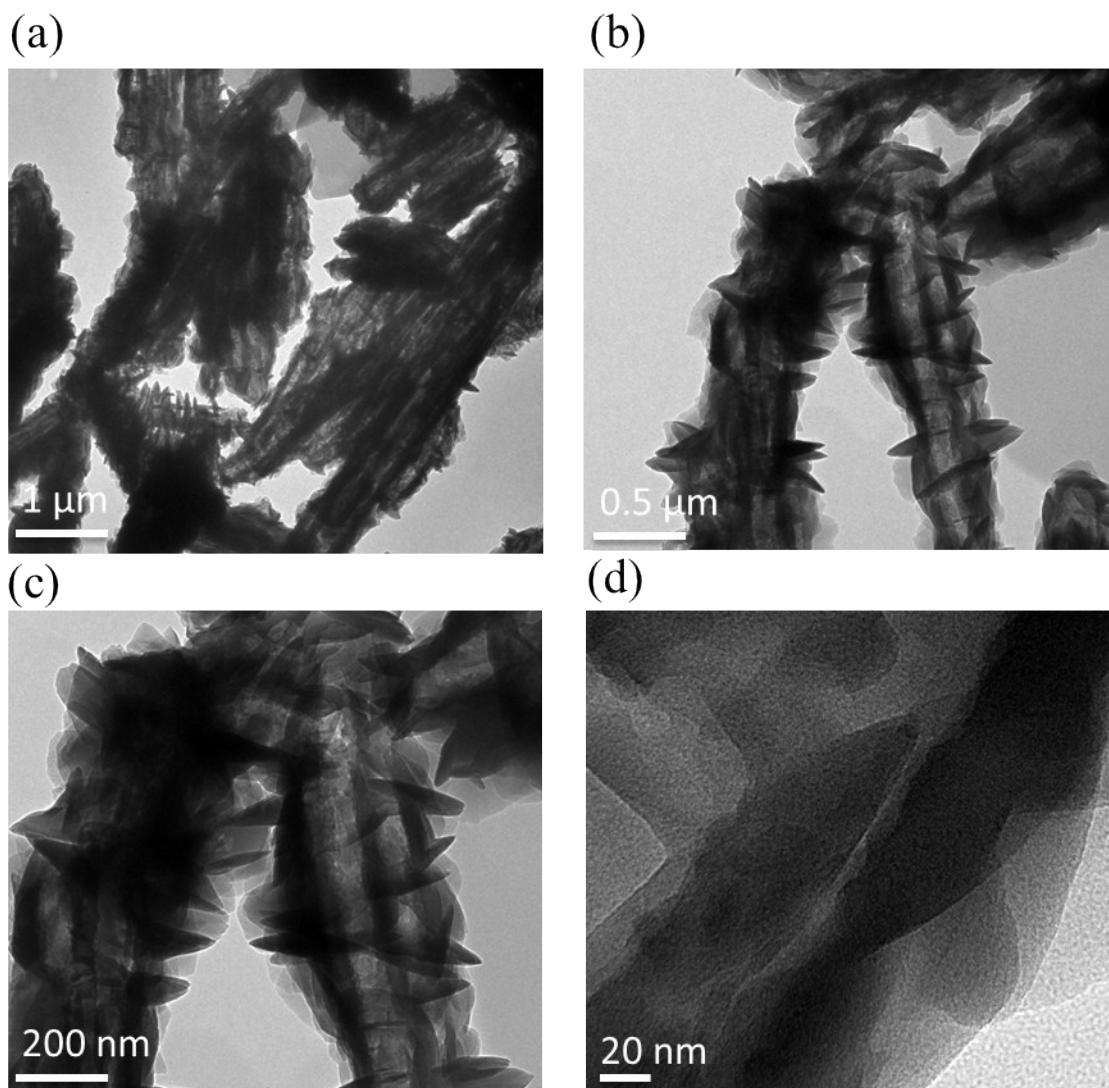

**Fig. S9.** TEM images of the TPPDA-TPPy COF recorded at various magnifications: (a) 1 μm, (b) 0.5 μm, (c) 200 nm, and (d) 20 nm.

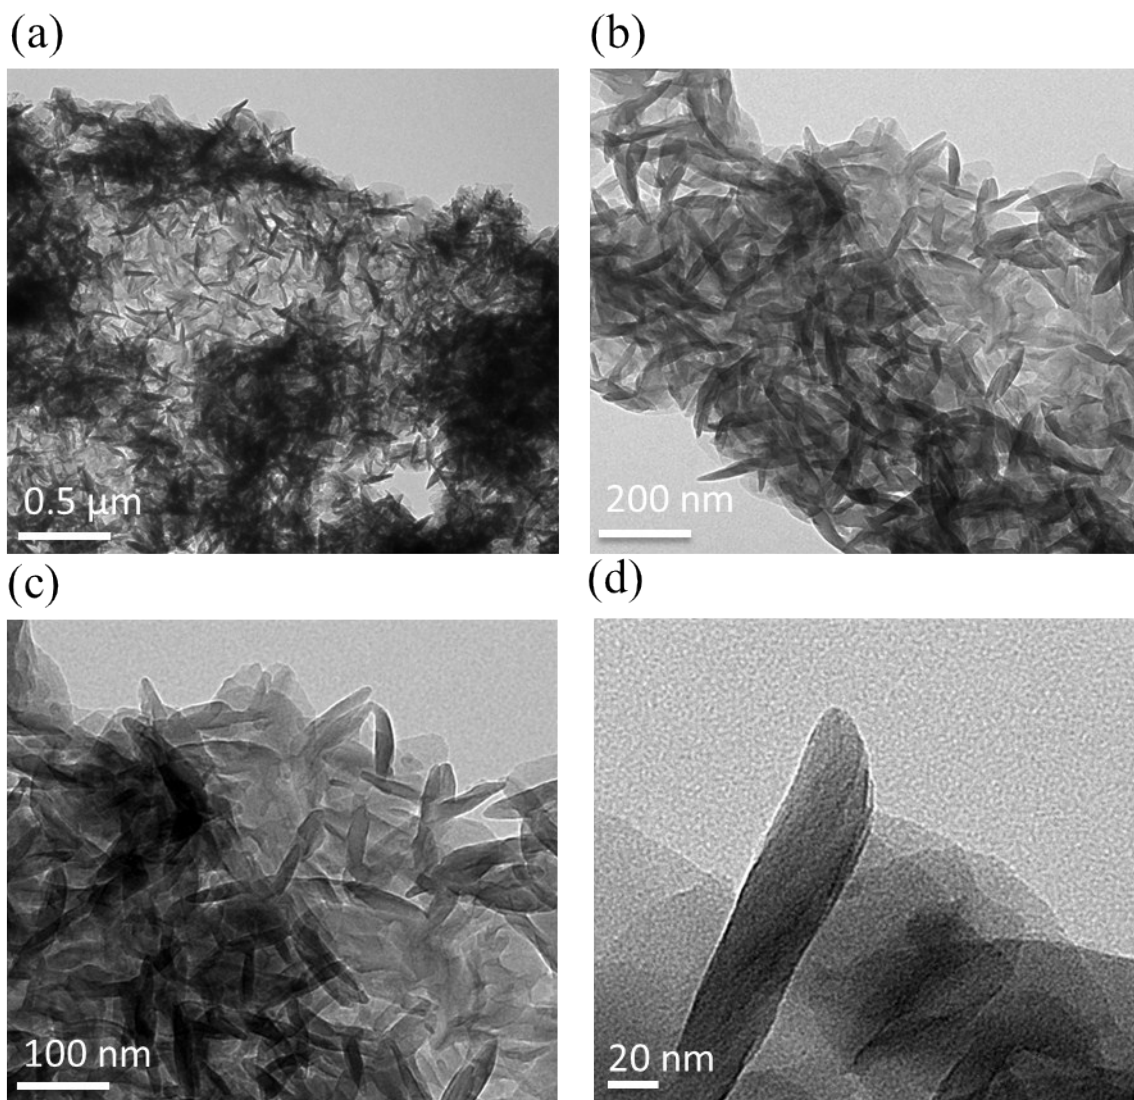

**Fig. S10.** TEM images of the TPPDA-TPTPE COF recorded at various magnifications: (a) 0.5  $\mu\text{m}$ , (b) 200 nm, (c) 100 nm, and (d) 20 nm.



## S9. Field Emission Scanning Electron Microscopy (FE-SEM)

(a)

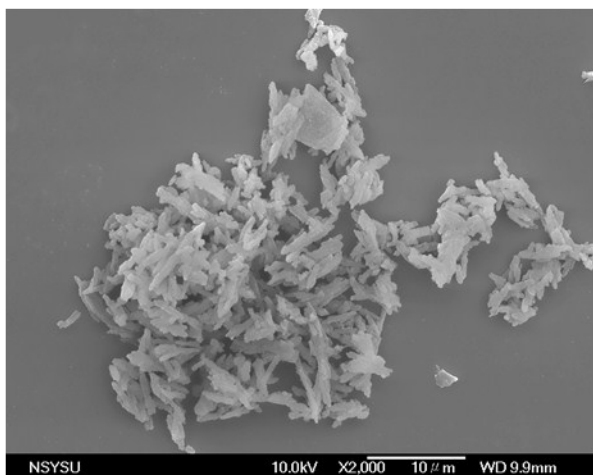

(b)

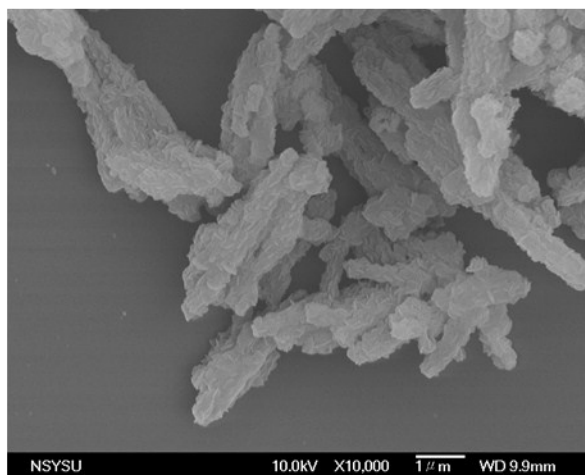

(c)

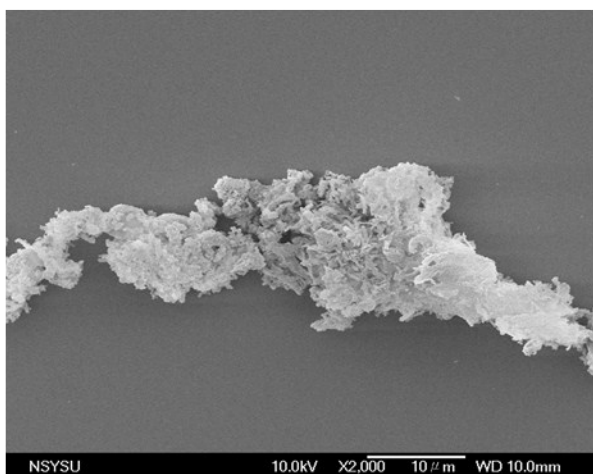

(d)

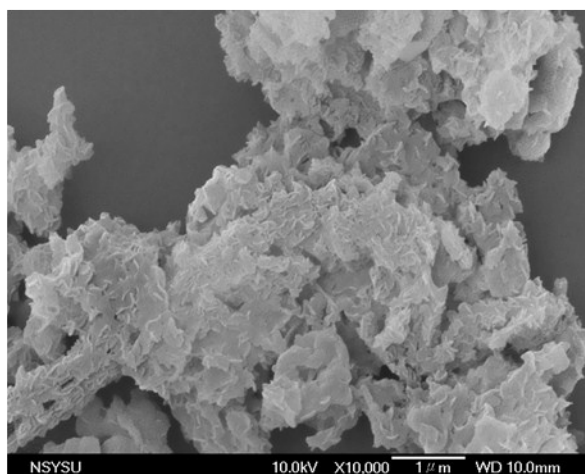

**Fig. S11.** FE-SEM images of the (a, b) TPPDA-TPPyr and (c, d) TPPDA-TPTPE COFs, recorded at various magnifications: (a, c) 10 and (b, d) 1 μm.

## S10. Experimental and Simulation X-ray Diffraction Patterns for COFs Structures

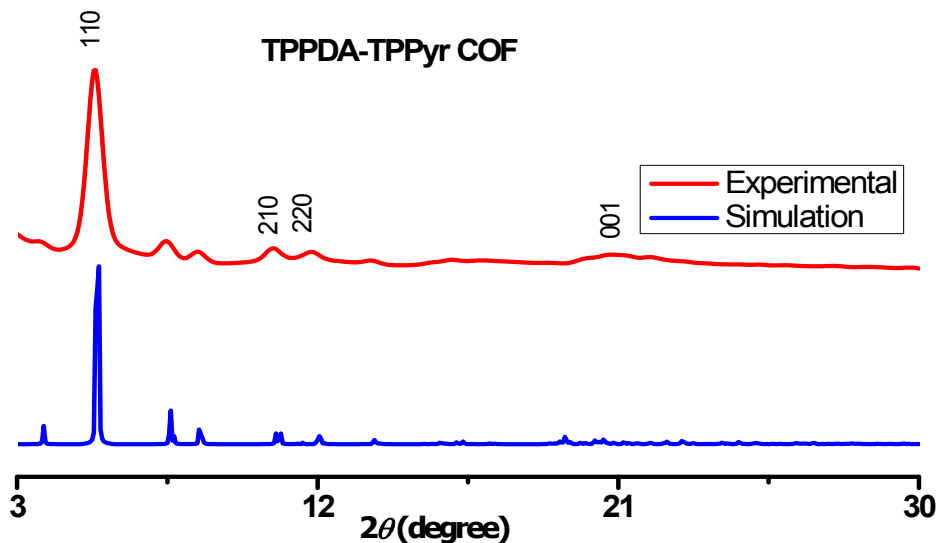

Fig. S12. PXRD pattern of the as-synthesized TPPDA-TPPy COF (red), compared with the simulated PXRD pattern of the eclipsed AA-stacking model (blue).

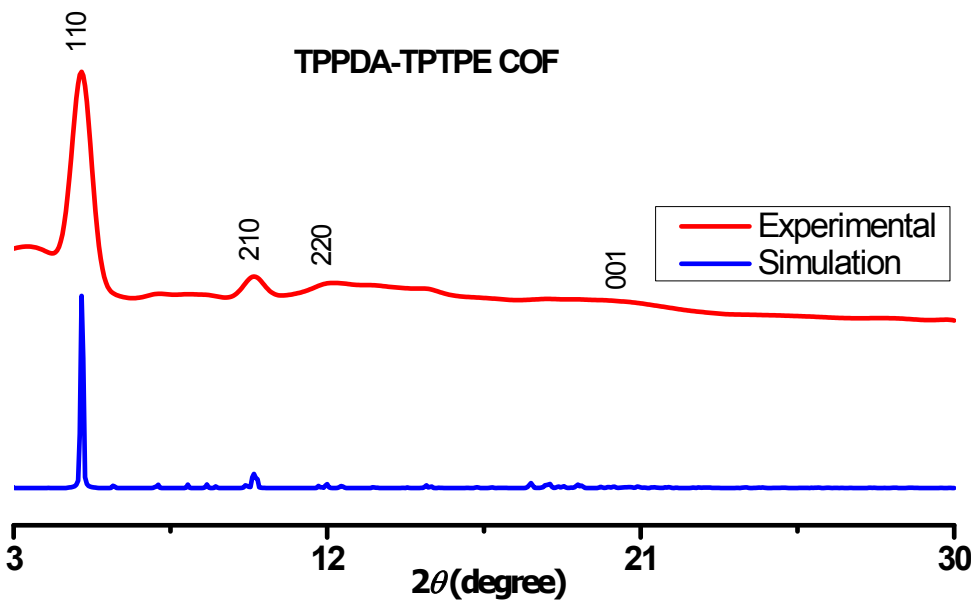

Fig. S13. PXRD pattern of the as-synthesized TPPDA-TPTPE COF (red), compared with the simulated PXRD pattern of the eclipsed AA-stacking model (blue).

## S11. PXRD data and BET parameters

**Table S2.** PXRD data and BET parameters of the synthesized TPPDA-TPPy and TPPDA-TPTPE

COFs.

| COFs            | $S_{\text{BET}}$<br>( $\text{m}^2 \text{g}^{-1}$ ) | $d_{100}$<br>(nm) | Pore size<br>(nm) | Interlayer<br>distance ( $\text{\AA}$ ) | Pore<br>Volume ( $\text{cm}^3 \text{g}^{-1}$ ) |
|-----------------|----------------------------------------------------|-------------------|-------------------|-----------------------------------------|------------------------------------------------|
| TPPDA-TPPy COF  | 1020                                               | 1.66              | 1.25              | 4.2                                     | 0.66                                           |
| TPPDA-TPTPE COF | 1067                                               | 1.78              | 1.57              | 4.4                                     | 0.84                                           |

## S12. Structural Modeling and Fractional atomic coordinates for COF Structures

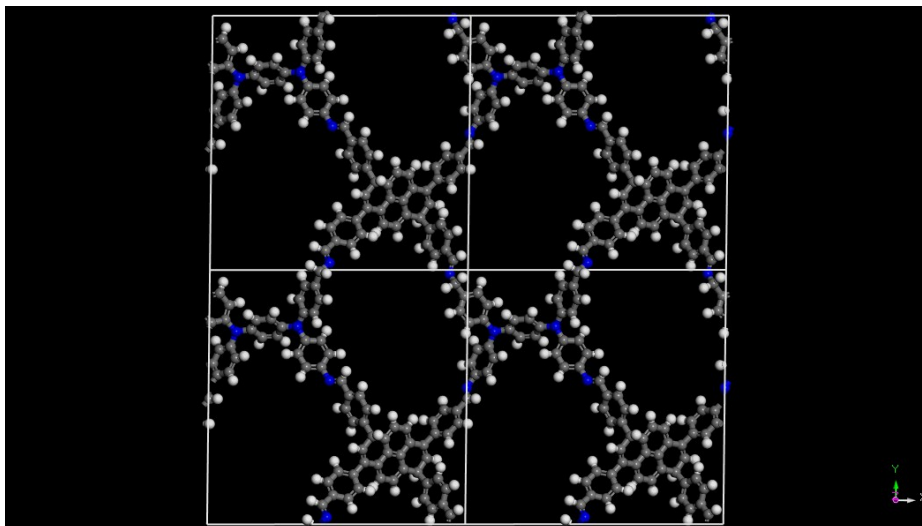

**Fig. S14.** 3D View along the  $c$ -axis of the simulated structure of the TPPDA-TPPyR COF.

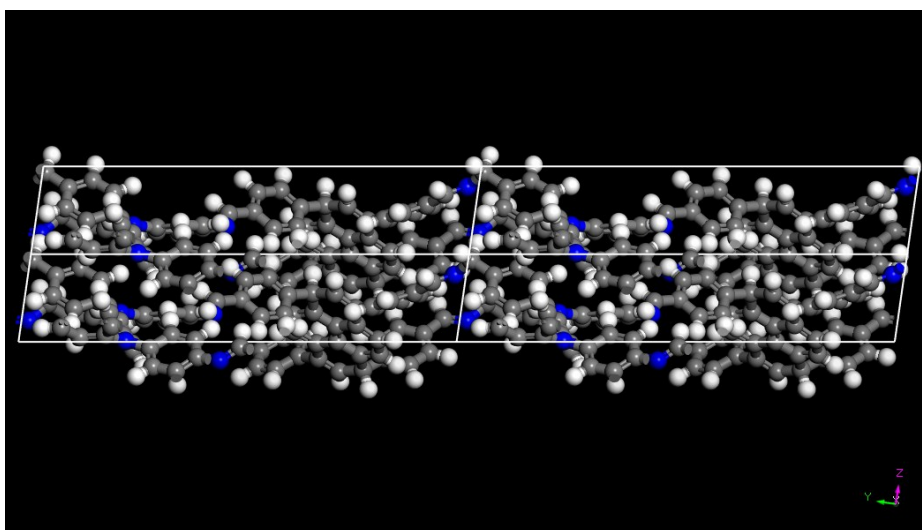

**Fig. S15.** 3D View along the  $a$ -axis of the simulated structure of the TPPDA-TPPyR COF.

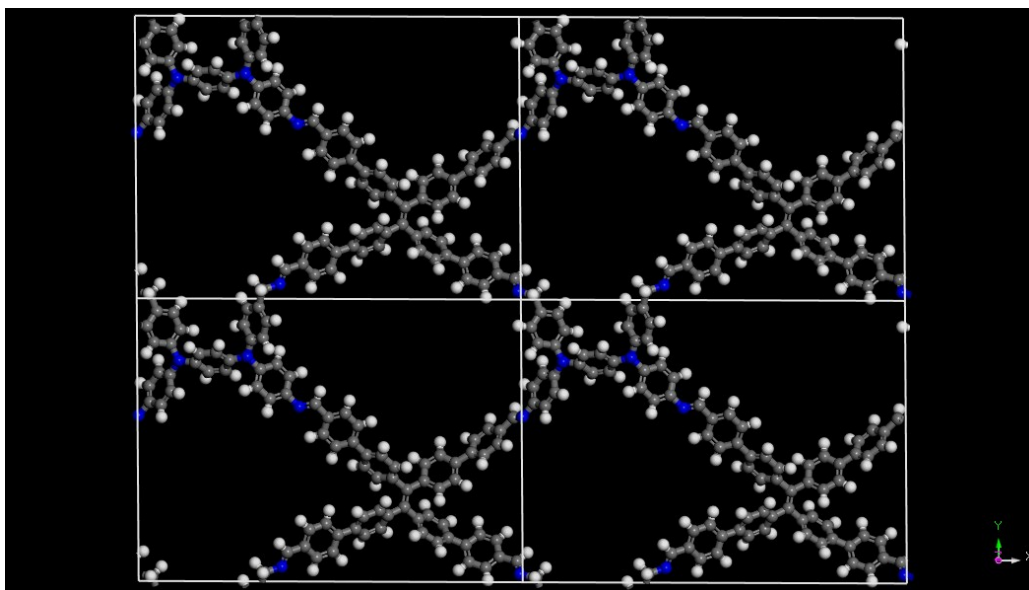

**Fig. S16.** 3D View along the *c*-axis of the simulated structure of the TPPDA-TPTPE COF.

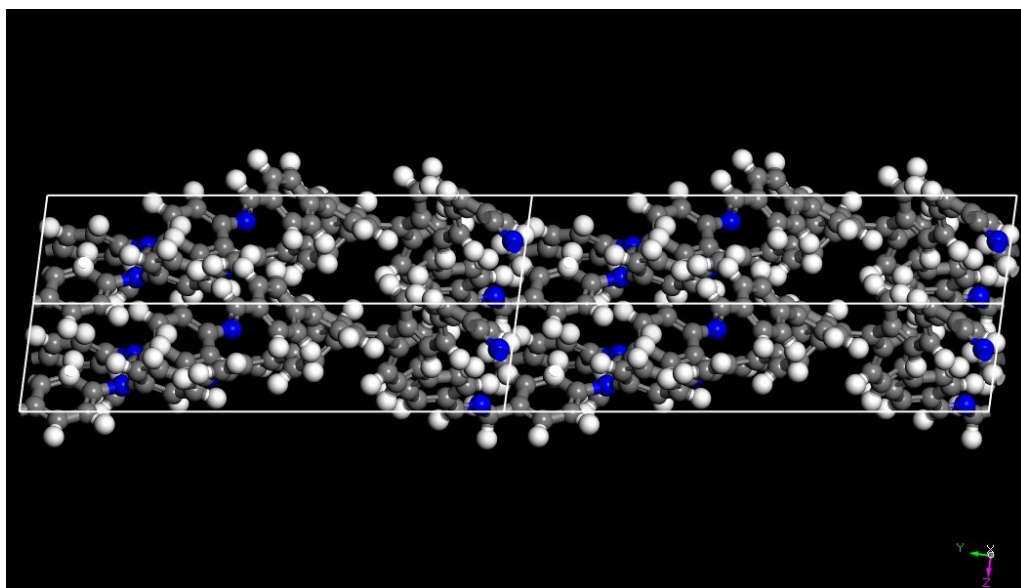

**Fig. S17.** 3D View along the *a*-axis of the simulated structure of the TPPDA-TPTPE COF.

**Table S3.** Fractional atomic coordinates for the unit cell of TPPDA-TPPy COF with AA-stacking.

| Sample name: TPPDA-TPPy COF                                                                                                                                    |          |          |          |      |         |         |          |
|----------------------------------------------------------------------------------------------------------------------------------------------------------------|----------|----------|----------|------|---------|---------|----------|
| Space group: P1                                                                                                                                                |          |          |          |      |         |         |          |
| $a = 23.72481 \text{ \AA}$ , $b = 23.98233 \text{ \AA}$ , $c = 4.51401 \text{ \AA}$ , $\alpha = 104.69^\circ$ , $\beta = 91.46^\circ$ , $\gamma = 90.11^\circ$ |          |          |          |      |         |         |          |
| $R_{wp} = 18.47 \%$ , $R_p = 14.02 \%$                                                                                                                         |          |          |          |      |         |         |          |
| Atom                                                                                                                                                           | $x/a$    | $y/b$    | $z/c$    | Atom | $x/a$   | $y/b$   | $z/c$    |
| N1                                                                                                                                                             | 0.92811  | -0.01674 | 0.23674  | C21  | 0.63683 | 0.3453  | 0.5551   |
| N2                                                                                                                                                             | 0.46192  | 0.02701  | 0.76183  | C22  | 0.59766 | 0.29393 | 0.54757  |
| N3                                                                                                                                                             | 0.33999  | 0.77687  | 0.32657  | C23  | 0.60624 | 0.24252 | 0.38139  |
| N4                                                                                                                                                             | 0.1027   | 0.75695  | 0.00988  | C24  | 0.60267 | 0.4006  | 0.53023  |
| N5                                                                                                                                                             | 0.46677  | 0.5643   | 0.31335  | C25  | 0.56478 | 0.195   | 0.40611  |
| N6                                                                                                                                                             | -0.00074 | 0.53522  | -0.21487 | C26  | 0.84969 | 0.16008 | -0.18928 |
| C7                                                                                                                                                             | 0.65791  | 0.23402  | 0.19436  | C27  | 0.87885 | 0.35642 | -0.16675 |
| C8                                                                                                                                                             | 0.66926  | 0.18052  | 0.02411  | C28  | 0.92748 | 0.35296 | 0.01169  |
| C9                                                                                                                                                             | 0.71837  | 0.17199  | -0.14126 | C29  | 0.96837 | 0.39702 | 0.04189  |
| C10                                                                                                                                                            | 0.75766  | 0.21683  | -0.14742 | C30  | 0.96165 | 0.44475 | -0.10913 |
| C11                                                                                                                                                            | 0.74512  | 0.27232  | 0.0042   | C31  | 0.91321 | 0.44779 | -0.28991 |
| C12                                                                                                                                                            | 0.69562  | 0.2807   | 0.17977  | C32  | 0.87187 | 0.40435 | -0.31475 |
| C13                                                                                                                                                            | 0.7814   | 0.31955  | -0.01837 | C33  | 0.8406  | 0.10005 | -0.26552 |
| C14                                                                                                                                                            | 0.76687  | 0.3748   | 0.12421  | C34  | 0.87093 | 0.05953 | -0.12386 |
| C15                                                                                                                                                            | 0.72066  | 0.38236  | 0.30821  | C35  | 0.91242 | 0.07824 | 0.08893  |
| C16                                                                                                                                                            | 0.68449  | 0.33592  | 0.33819  | C36  | 0.92364 | 0.13771 | 0.15427  |
| C17                                                                                                                                                            | 0.81228  | 0.20454  | -0.31954 | C37  | 0.89244 | 0.17799 | 0.01867  |
| C18                                                                                                                                                            | 0.84654  | 0.25879  | -0.33994 | C38  | 0.61429 | 0.45118 | 0.72392  |
| C20                                                                                                                                                            | 0.83457  | 0.31073  | -0.18919 | C39  | 0.58574 | 0.50346 | 0.69717  |

Continuous Table S3

| <b>Atom</b> | $x/a$   | $y/b$   | $z/c$    | <b>Atom</b> | $x/a$    | $y/b$   | $z/c$    |
|-------------|---------|---------|----------|-------------|----------|---------|----------|
| C40         | 0.53133 | 0.45536 | 0.28927  | C64         | 0.03233  | 0.58751 | -0.17931 |
| C41         | 0.56113 | 0.40322 | 0.31127  | C65         | 0.07806  | 0.59788 | 0.0212   |
| C42         | 0.50535 | 0.20621 | 0.39515  | C66         | 0.10304  | 0.65295 | 0.07413  |
| C43         | 0.46632 | 0.16597 | 0.47127  | C67         | 0.0756   | 0.86184 | 0.0559   |
| C44         | 0.48585 | 0.11352 | 0.55744  | C68         | 0.03856  | 0.90773 | 0.16033  |
| C45         | 0.54484 | 0.10051 | 0.55008  | C69         | -0.01386 | 0.89628 | 0.28183  |
| C46         | 0.58382 | 0.1409  | 0.47591  | C70         | -0.03036 | 0.8385  | 0.28149  |
| C47         | 0.94178 | 0.03781 | 0.26081  | C71         | 0.00651  | 0.79286 | 0.17724  |
| C48         | 1.00322 | 0.49263 | -0.06285 | C72         | 0.34472  | 0.66986 | 0.33151  |
| C49         | 0.51454 | 0.56205 | 0.45875  | C73         | 0.37605  | 0.61788 | 0.32398  |
| C50         | 0.44522 | 0.07608 | 0.68222  | C74         | 0.43554  | 0.61743 | 0.2963   |
| C51         | 0.28042 | 0.77628 | 0.23374  | C75         | 0.46339  | 0.66909 | 0.25917  |
| C52         | 0.2386  | 0.80762 | 0.40526  | C76         | 0.43187  | 0.72101 | 0.25978  |
| C53         | 0.18039 | 0.80229 | 0.32932  | C77         | 0.40396  | 0.83106 | 0.69798  |
| C54         | 0.16287 | 0.76614 | 0.07824  | C78         | 0.42644  | 0.88336 | 0.83782  |
| C55         | 0.20477 | 0.73582 | -0.09609 | C79         | 0.40846  | 0.93669 | 0.75592  |
| C56         | 0.26295 | 0.7414  | -0.02052 | C80         | 0.36942  | 0.93678 | 0.52531  |
| C57         | 0.08306 | 0.69816 | -0.07293 | C81         | 0.34824  | 0.88436 | 0.38018  |
| C58         | 0.06114 | 0.80388 | 0.07536  | C82         | 0.42633  | 0.99325 | 0.92962  |
| C59         | 0.36483 | 0.83079 | 0.4661   | H83         | 0.63996  | 0.14467 | 0.0138   |
| C60         | 0.37227 | 0.72245 | 0.30412  | H84         | 0.72534  | 0.12986 | -0.26737 |
| C61         | 0.04008 | 0.68649 | -0.28442 | H85         | 0.79251  | 0.41237 | 0.10298  |
| C62         | 0.01494 | 0.63164 | -0.33704 | H86         | 0.71315  | 0.42509 | 0.42791  |

Continuous Table S3

| <b>Atom</b> | $x/a$   | $y/b$   | $z/c$    | <b>Atom</b> | $x/a$    | $y/b$   | $z/c$    |
|-------------|---------|---------|----------|-------------|----------|---------|----------|
| H87         | 0.79962 | 0.18617 | -0.54345 | H111        | 0.25093  | 0.83393 | 0.60556  |
| H88         | 0.88667 | 0.25329 | -0.45278 | H112        | 0.14878  | 0.82437 | 0.47275  |
| H89         | 0.65838 | 0.35049 | 0.76937  | H113        | 0.19213  | 0.70777 | -0.29052 |
| H90         | 0.56178 | 0.29911 | 0.69326  | H114        | 0.29471  | 0.71763 | -0.15593 |
| H91         | 0.93298 | 0.31716 | 0.13447  | H115        | 0.02453  | 0.72095 | -0.39768 |
| H92         | 1.00472 | 0.39434 | 0.18723  | H116        | -0.01981 | 0.62386 | -0.49363 |
| H93         | 0.90671 | 0.48451 | -0.40645 | H117        | 0.09345  | 0.56484 | 0.14504  |
| H94         | 0.83383 | 0.40882 | -0.44312 | H118        | 0.13595  | 0.66122 | 0.24021  |
| H95         | 0.80949 | 0.08446 | -0.43172 | H119        | 0.11655  | 0.87155 | -0.02965 |
| H96         | 0.86167 | 0.01368 | -0.17771 | H120        | 0.05149  | 0.95226 | 0.15618  |
| H97         | 0.95521 | 0.15329 | 0.31878  | H121        | -0.07091 | 0.82865 | 0.37132  |
| H98         | 0.90142 | 0.22342 | 0.07959  | H122        | -0.00706 | 0.74892 | 0.18666  |
| H99         | 0.64623 | 0.45042 | 0.89423  | H123        | 0.29896  | 0.66908 | 0.36427  |
| H100        | 0.59575 | 0.54185 | 0.84857  | H124        | 0.35446  | 0.57805 | 0.3508   |
| H101        | 0.4995  | 0.45665 | 0.11884  | H125        | 0.50933  | 0.66898 | 0.22979  |
| H102        | 0.55203 | 0.36499 | 0.15766  | H126        | 0.45407  | 0.76032 | 0.23069  |
| H103        | 0.48939 | 0.24728 | 0.33905  | H127        | 0.41597  | 0.79079 | 0.7753   |
| H104        | 0.42099 | 0.17676 | 0.47351  | H128        | 0.45587  | 0.88234 | 1.01852  |
| H105        | 0.5609  | 0.06033 | 0.61587  | H129        | 0.35477  | 0.97759 | 0.46111  |
| H106        | 0.62912 | 0.13078 | 0.4858   | H130        | 0.31855  | 0.88543 | 0.20077  |
| H107        | 0.97194 | 0.05576 | 0.42795  | H131        | 0.45125  | 0.98526 | 1.12516  |
| H108        | 1.03471 | 0.49271 | 0.10963  | H132        | 0.38717  | 1.01808 | 1.00742  |
| H109        | 0.53149 | 0.60126 | 0.58337  | H133        | -0.02236 | 0.96913 | 0.61086  |
| H110        | 0.40207 | 0.09246 | 0.72771  | H134        | -0.08591 | 0.92766 | 0.5442   |



**Table S4.** Fractional atomic coordinates for the unit cell of TPPDA-TPTPE COF with AA-stacking.

| Sample name: TPPDA-TPTPE COF                                                                                                                                  |         |         |         |      |         |         |         |
|---------------------------------------------------------------------------------------------------------------------------------------------------------------|---------|---------|---------|------|---------|---------|---------|
| Space group: P1                                                                                                                                               |         |         |         |      |         |         |         |
| $a = 30.17763 \text{ \AA}$ , $b = 22.29763 \text{ \AA}$ , $c = 5.02702 \text{ \AA}$ , $\alpha = 82.62^\circ$ , $\beta = 86.04^\circ$ , $\gamma = 90.06^\circ$ |         |         |         |      |         |         |         |
| $R_{wp} = 9.78\%$ , $R_p = 7.65\%$                                                                                                                            |         |         |         |      |         |         |         |
| Atom                                                                                                                                                          | $x/a$   | $y/b$   | $z/c$   | Atom | $x/a$   | $y/b$   | $z/c$   |
| N1                                                                                                                                                            | 0.37169 | 0.051   | 0.93628 | C20  | 0.0566  | 0.73748 | 0.18672 |
| N2                                                                                                                                                            | 0.28559 | 0.79503 | 0.75984 | C21  | 0.03027 | 0.69019 | 0.12617 |
| N3                                                                                                                                                            | 0.10767 | 0.77954 | 0.47859 | C22  | 0.03189 | 0.63252 | 0.27619 |
| N4                                                                                                                                                            | 0.42018 | 0.61757 | 0.67401 | C23  | 0.06072 | 0.62328 | 0.48391 |
| N5                                                                                                                                                            | 0.00169 | 0.58456 | 0.24294 | C24  | 0.08695 | 0.67089 | 0.54532 |
| N6                                                                                                                                                            | 0.99173 | 0.02772 | 0.42358 | C25  | 0.11239 | 0.89052 | 0.36015 |
| C7                                                                                                                                                            | 0.38697 | 0.10342 | 0.9746  | C26  | 0.09457 | 0.94798 | 0.37198 |
| C8                                                                                                                                                            | 0.32664 | 1.03131 | 1.03204 | C27  | 0.05141 | 0.9543  | 0.4869  |
| C9                                                                                                                                                            | 0.0347  | 1.01563 | 0.53607 | C28  | 0.02558 | 0.90239 | 0.57742 |
| C10                                                                                                                                                           | 0.23988 | 0.78221 | 0.71571 | C29  | 0.04321 | 0.84482 | 0.56122 |
| C11                                                                                                                                                           | 0.20538 | 0.8086  | 0.86069 | C30  | 0.31092 | 0.6887  | 0.83027 |
| C12                                                                                                                                                           | 0.16154 | 0.80395 | 0.79459 | C31  | 0.34426 | 0.6455  | 0.80774 |
| C13                                                                                                                                                           | 0.15109 | 0.77295 | 0.58148 | C32  | 0.38687 | 0.66297 | 0.6972  |
| C14                                                                                                                                                           | 0.18481 | 0.74194 | 0.4512  | C33  | 0.3955  | 0.72426 | 0.60258 |
| C15                                                                                                                                                           | 0.22909 | 0.74735 | 0.51465 | C34  | 0.36235 | 0.76725 | 0.62529 |
| C16                                                                                                                                                           | 0.08441 | 0.72877 | 0.40016 | C35  | 0.32725 | 0.86127 | 1.01544 |
| C17                                                                                                                                                           | 0.08725 | 0.83842 | 0.46031 | C36  | 0.33751 | 0.91865 | 1.08011 |
| C18                                                                                                                                                           | 0.29741 | 0.85457 | 0.81914 | C37  | 0.31732 | 0.97014 | 0.95278 |
| C19                                                                                                                                                           | 0.31964 | 0.75005 | 0.73791 | C38  | 0.28753 | 0.96367 | 0.7559  |

Continuous Table S4

| <b>Atom</b> | $x/a$   | $y/b$   | $z/c$   | <b>Atom</b> | $x/a$   | $y/b$   | $z/c$    |
|-------------|---------|---------|---------|-------------|---------|---------|----------|
| C39         | 0.27827 | 0.90649 | 0.68646 | C64         | 0.77743 | 0.14043 | 0.35861  |
| C40         | 0.46267 | 0.62793 | 0.6698  | C65         | 0.80619 | 0.15626 | 0.12775  |
| C41         | 0.97862 | 0.58165 | 0.03554 | C66         | 0.79311 | 0.20207 | -0.06987 |
| C42         | 0.69959 | 0.32588 | 0.27559 | C67         | 0.75411 | 0.23448 | -0.0271  |
| C43         | 0.69257 | 0.26445 | 0.29176 | C68         | 0.51886 | 0.16525 | 0.68791  |
| C44         | 0.64943 | 0.23549 | 0.40442 | C69         | 0.56042 | 0.49385 | 0.52162  |
| C45         | 0.7282  | 0.2226  | 0.21611 | C70         | 0.8688  | 0.45721 | 0.07869  |
| C46         | 0.74444 | 0.35643 | 0.20954 | C71         | 0.85161 | 0.13027 | 0.11118  |
| C47         | 0.66243 | 0.36706 | 0.34047 | C72         | 0.57295 | 0.55232 | 0.56572  |
| C48         | 0.66788 | 0.40609 | 0.53293 | C73         | 0.54088 | 0.59511 | 0.61792  |
| C49         | 0.63461 | 0.44641 | 0.59472 | C74         | 0.49556 | 0.58065 | 0.62563  |
| C50         | 0.59493 | 0.44893 | 0.4632  | C75         | 0.48275 | 0.52224 | 0.58288  |
| C51         | 0.58919 | 0.40948 | 0.27096 | C76         | 0.51493 | 0.47915 | 0.53172  |
| C52         | 0.62262 | 0.36889 | 0.21054 | C77         | 0.9005  | 0.44947 | 0.27285  |
| C53         | 0.78408 | 0.33076 | 0.30229 | C78         | 0.93754 | 0.48802 | 0.25364  |
| C54         | 0.8246  | 0.36209 | 0.25094 | C79         | 0.94353 | 0.53526 | 0.04095  |
| C55         | 0.82654 | 0.4213  | 0.11511 | C80         | 0.91336 | 0.54113 | -0.16017 |
| C56         | 0.78693 | 0.44764 | 0.02791 | C81         | 0.87652 | 0.50248 | -0.14218 |
| C57         | 0.74677 | 0.41579 | 0.07399 | C82         | 0.48787 | 0.2041  | 0.79756  |
| C58         | 0.62794 | 0.2521  | 0.63933 | C83         | 0.44527 | 0.18341 | 0.89178  |
| C59         | 0.58553 | 0.23006 | 0.72832 | C84         | 0.43229 | 0.12379 | 0.87421  |
| C60         | 0.56463 | 0.18739 | 0.59481 | C85         | 0.46273 | 0.08495 | 0.76141  |
| C61         | 0.58793 | 0.16647 | 0.37307 | C86         | 0.50571 | 0.10534 | 0.67065  |
| C62         | 0.63006 | 0.19001 | 0.28037 | C87         | 0.85962 | 0.07091 | 0.22945  |
| C63         | 0.73868 | 0.17298 | 0.40107 | C88         | 0.90308 | 0.05089 | 0.26155  |

Continuous Table S4

| <b>Atom</b> | $x/a$    | $y/b$   | $z/c$    | <b>Atom</b> | $x/a$   | $y/b$   | $z/c$    |
|-------------|----------|---------|----------|-------------|---------|---------|----------|
| C89         | 0.93935  | 0.08942 | 0.17184  | H113        | 0.36993 | 0.81417 | 0.5528   |
| C90         | 0.93158  | 0.14677 | 0.03425  | H114        | 0.34212 | 0.82172 | 1.11882  |
| C91         | 0.88819  | 0.16721 | 0.00584  | H115        | 0.3605  | 0.92311 | 1.23289  |
| C92         | 0.98483  | 0.07341 | 0.24385  | H116        | 0.27151 | 1.00284 | 0.65571  |
| H93         | 0.36593  | 0.13366 | 1.0787   | H117        | 0.25581 | 0.90239 | 0.53077  |
| H94         | 0.3227   | 1.0289  | 1.2546   | H118        | 0.47499 | 0.67214 | 0.69832  |
| H95         | 0.30258  | 1.06492 | 0.94599  | H119        | 0.98243 | 0.61555 | -0.13889 |
| H96         | 0.0595   | 1.05148 | 0.4549   | H120        | 0.69832 | 0.40501 | 0.63377  |
| H97         | 0.03048  | 1.01645 | 0.75707  | H121        | 0.6398  | 0.47527 | 0.74762  |
| H98         | 0.21274  | 0.83466 | 1.0199   | H122        | 0.55938 | 0.4111  | 0.16214  |
| H99         | 0.13571  | 0.82682 | 0.90124  | H123        | 0.6175  | 0.33951 | 0.06088  |
| H100        | 0.17721  | 0.71741 | 0.28743  | H124        | 0.78422 | 0.28661 | 0.41681  |
| H101        | 0.25514  | 0.72721 | 0.39751  | H125        | 0.8543  | 0.3399  | 0.32041  |
| H102        | 0.05445  | 0.78169 | 0.07242  | H126        | 0.78643 | 0.49395 | -0.06742 |
| H103        | 0.00775  | 0.69992 | -0.03116 | H127        | 0.717   | 0.43898 | 0.01234  |
| H104        | 0.0616   | 0.57942 | 0.60383  | H128        | 0.64406 | 0.28283 | 0.75195  |
| H105        | 0.10771  | 0.66337 | 0.71341  | H129        | 0.5695  | 0.24567 | 0.90568  |
| H106        | 0.14635  | 0.88648 | 0.28087  | H130        | 0.57297 | 0.13376 | 0.26407  |
| H107        | 0.1151   | 0.98742 | 0.30107  | H131        | 0.64694 | 0.17414 | 0.10582  |
| H108        | -0.00777 | 0.9068  | 0.66665  | H132        | 0.7186  | 0.16229 | 0.58846  |
| H109        | 0.02326  | 0.80521 | 0.63761  | H133        | 0.78643 | 0.106   | 0.51714  |
| H110        | 0.27843  | 0.6745  | 0.92123  | H134        | 0.81386 | 0.21412 | -0.25315 |
| H111        | 0.33727  | 0.59836 | 0.87913  | H135        | 0.74539 | 0.27149 | -0.17436 |
| H112        | 0.4275   | 0.73895 | 0.50633  | H136        | 0.60764 | 0.56546 | 0.55445  |

Continuous Table S4

| <b>Atom</b> | <b><i>x/a</i></b> | <b><i>y/b</i></b> | <b><i>z/c</i></b> | <b>Atom</b> | <b><i>x/a</i></b> | <b><i>y/b</i></b> | <b><i>z/c</i></b> |
|-------------|-------------------|-------------------|-------------------|-------------|-------------------|-------------------|-------------------|
| H137        | 0.55152           | 0.63995           | 0.64893           | H145        | 0.42224           | 0.21422           | 0.97685           |
| H138        | 0.4479            | 0.51025           | 0.58754           | H146        | 0.45324           | 0.03871           | 0.74622           |
| H139        | 0.50426           | 0.43427           | 0.50181           | H147        | 0.52877           | 0.0739            | 0.59111           |
| H140        | 0.89561           | 0.41585           | 0.44795           | H148        | 0.8323            | 0.04071           | 0.3066            |
| H141        | 0.96056           | 0.48258           | 0.41088           | H149        | 0.90845           | 0.0062            | 0.366             |
| H142        | 0.91765           | 0.57677           | -0.32829          | H150        | 0.9591            | 0.17715           | -0.03735          |
| H143        | 0.85376           | 0.50869           | -0.3005           | H151        | 0.88349           | 0.21336           | -0.08346          |
| H144        | 0.49632           | 0.25087           | 0.80824           | H152        | 1.0119            | 0.10411           | 0.16584           |

## Section 13. Electrochemical Analysis

**Working Electrode Cleaning:** Prior to use, the glassy carbon electrode (GCE) was polished several times with 0.05- $\mu\text{m}$  alumina powder, washed with EtOH after each polishing step, cleaned via sonication (5 min) in a water bath, washed with EtOH, and then dried in air.

**Electrochemical Characterization:** The electrochemical experiments were performed in a three-electrode cell using an Autolab potentiostat (PGSTAT204) and 1 M KOH as the aqueous electrolyte. The GCE was used as the working electrode (diameter: 5.61 mm; 0.2475 cm<sup>2</sup>). A Pt wire was used as the counter electrode; Hg/HgO (RE-61AP, BAS) was used as the reference electrode. All reported potentials refer to the Hg/HgO potential. The GCE was modified with COF slurries, as described elsewhere, but with some modifications.<sup>S5-S7</sup> The slurries were prepared by dispersing the COF (45 wt. %), carbon black (45 wt. %), and Nafion (10 wt. %) in EtOH (2 mL) and then sonicating for 1 h. A portion of this slurry (10  $\mu\text{L}$ ) was pipetted onto the tip of the electrode, which was then dried in air for 30 min prior to use. The electrochemical performance was studied through CV at various sweep rates (from 5 to 200 mV s<sup>-1</sup>) and through the GCD method in the potential range from +0.18 to -0.92 V vs. Hg/HgO at various current densities (from 2 to 20 A g<sup>-1</sup>) in 1 M KOH as the aqueous electrolyte solution.

The specific capacitance was calculated from the GCD data using the following equation:<sup>S7,S8</sup>

$$C_s = (I\Delta t)/(m\Delta V) \quad (\text{S1})$$

where  $C_s$  (F g<sup>-1</sup>) is specific capacitance of the supercapacitor,  $I$  (A) is the discharge current,  $\Delta V$  (V) is the potential window,  $\Delta t$  (s) is the discharge time, and  $m$  (g) is the mass of the COF on the electrode. The energy density ( $E$ , Wh kg<sup>-1</sup>), and the power density ( $P$ , W kg<sup>-1</sup>) were calculated using the following equations:<sup>S4</sup>

$$E = 1000C(\Delta V)^2/(2*3600) \quad (\text{S2})$$

$$P = E/(t/3600) \quad (\text{S3})$$

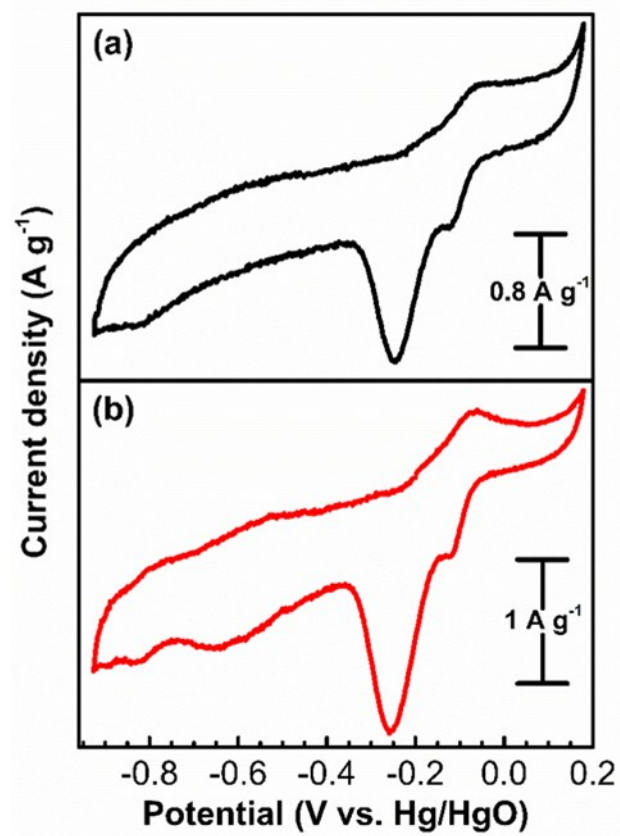

**Fig. S18.** Cyclic voltammograms of the (a) TPPDA-TPPy and (b) TPPDA-TPTPE COFs recorded at scan rate of  $5 \text{ mV s}^{-1}$  in 1 M KOH.

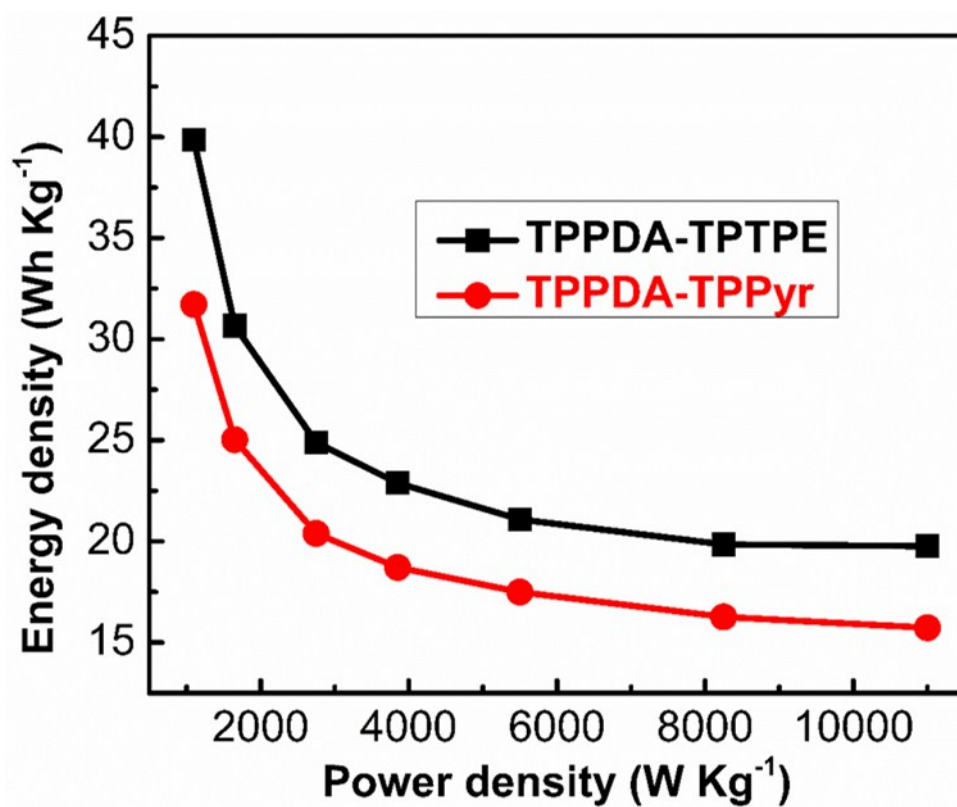

**Fig. S19.** Ragone plots of the energy density and power density of the TPPDA-TPPy and TPPDA-TPTPE COF electrodes in 1 M KOH.

**Table S5.** Comparison between the specific surface area/specific capacitance of TPPDA–TPPy and TPPDA–TPTPE COFs with those of previously reported COFs for supercapacitor application

| COFs         | $S_{\text{BET}}$<br>( $\text{m}^2 \text{g}^{-1}$ ) | Capacitance                                           | Ref.      |
|--------------|----------------------------------------------------|-------------------------------------------------------|-----------|
| TPPDA–TPPy   | 1020                                               | 188.7 $\text{F g}^{-1}$ at 2 $\text{A g}^{-1}$        | This work |
| TPPDA–TPTPE  | 1067                                               | 237.1 $\text{F g}^{-1}$ at 2 $\text{A g}^{-1}$        | This work |
| TPT–DAHQ COF | 1855                                               | 181.1 $\text{F g}^{-1}$ at 0.2 $\text{A g}^{-1}$      | S5        |
| Car–TPA COF  | 1334                                               | 13.6 $\text{F g}^{-1}$ at 0.2 $\text{A g}^{-1}$       | S6        |
| Car–TPP COF  | 743                                                | 14.5 $\text{F g}^{-1}$ at 0.2 $\text{A g}^{-1}$       | S6        |
| Car–TPT COF  | 721                                                | 17.4 $\text{F g}^{-1}$ at 0.2 $\text{A g}^{-1}$       | S6        |
| DAAQ–TFP COF | 1280                                               | $48 \pm 10 \text{ F g}^{-1}$ at 0.1 $\text{A g}^{-1}$ | S7        |
| TPA–COF–1    | 714                                                | 51.3 $\text{F g}^{-1}$ at 0.2 $\text{A g}^{-1}$       | S9        |
| TPA–COF–2    | 478                                                | 14.4 $\text{F g}^{-1}$ at 0.2 $\text{A g}^{-1}$       | S9        |
| TPA–COF–3    | 557                                                | 5.1 $\text{F g}^{-1}$ at 0.2 $\text{A g}^{-1}$        | S9        |
| TPT–COF–4    | 1132                                               | 2.4 $\text{F g}^{-1}$ at 0.2 $\text{A g}^{-1}$        | S9        |
| TPT–COF–5    | 1747                                               | 0.34 $\text{F g}^{-1}$ at 0.2 $\text{A g}^{-1}$       | S9        |
| TPT–COF–6    | 1535                                               | 0.24 $\text{F g}^{-1}$ at 0.2 $\text{A g}^{-1}$       | S9        |
| TaPay–Py COF | 687                                                | 209 $\text{F g}^{-1}$ at 0.5 $\text{A g}^{-1}$        | S10       |
| DAB–TFP COF  | 385                                                | 98 $\text{F g}^{-1}$ at 0.5 $\text{A g}^{-1}$         | S10       |



## S14. References

- S1. M. G. Rabbani, A. K. Sekizkardes, O. M. El-Kadri, B. R. Kaafarani and H. M. El-Kaderi, J. *Mater. Chem.*, 2012, **22(48)**, 25409.
- S2. P. Rios, T. S. Carter, T. J. Mooibroek, M. P. Crump, M. Lisbjerg, M. Pittelkow, N. T. Supekar, G. J. Boons and A. P. Davis, *Angew. Chem. Int. Ed.* 2016, **55(10)**, 3387.
- S3. X. Yunfeng, C. Dan, F. Shi, Z. Chong and J. Jia-Xing, *New J. Chem.*, 2016, **40**, 9415.
- S4. L. Weijun, Z. Yixuan, Z. Jianyong, H. Jiajun, C. Zhenguo, M. W. Philip, C. Liuping and S. Cheng-Yong, *Chem. Commun.*, 2014, **50**, 11942.
- S5. A. F. EL-Mahdy, Y. Hung, T. H. Mansoure, H.-H. Yu, T. Chen and S. Kuo, *Chem. Asian J.*, 2019, **14(9)**, 1429.
- S6. A. F. M. EL-Mahdy, C. Young, J. Kim, J. You, Y. Yamauchi and S. W. Kuo, *ACS Appl. Mater. Interfaces*, 2019, **11(9)**, 9343.
- S7. C. R. DeBlase, K. E. Silberstein, T.-T. Truong, H. D. Abruña and W. R. Dichtel, *J. Am. Chem. Soc.*, 2013, **135**, 16821.
- S8. A. Alabadi, X. Yang, Z. Dong, Z. Li and B. Tan, *J. Mater. Chem. A*, 2014, **2**, 11697.
- S9. A. F. M. El-Mahdy, C.-H. Kuo, A. A. Alshehri, J. Kim, C. Young, Y. Yamauchi and S.-W Kuo, *J. Mater. Chem. A* **2018**, 19532.
- S10. A. M. Khattak, Z. A. Ghazi, B. Liang, N. A. Khan, A. Iqbal, L. Li and Z. Tang, *J. Mater. Chem. A*, 2016, **4**, 16312.
